# Supplementary material
Source: HighWire-hosted journal article supplement (http://www.qdcxjkg.com/highwire/filestream/113811/field_highwire_adjunct_files/0/ERJ-00841-2012_Disclosures.pdf)
Supplement: ERJ-00841-2012_Disclosures.pdf [file ERJ-00841-2012_Disclosures.pdf]

**S.M. Kawut** is a consultant for Gilead, Actelion, Pfizer, Novartis, Merck, Ikaria and Bayer, and has received funding for clinical trials and observational studies from Actelion and Gilead.

**D.J. Lederer** serves on Steering Committees for clinical trials in IPF for Intermune and Gilead and serves on Advisory Panels for Gilead and ImmuneWorks. He is a steering committee member for ASCEND, sponsored by Intermune, a study investigating Pirfenidone in Idiopathic Pulmonary Fibrosis.
